# Supplementary material for: Comparison of multi-parallel qPCR and double-slide Kato-Katz for detection of soil-transmitted helminth infection among children in rural Bangladesh
Source: PubMed Central journal article supplement (PMC7202662; doi:10.1371/journal.pntd.0008087), 2020-04-24
Supplement: pntd.0008087.s001.pdf [file pntd.0008087.s001.pdf]

**Comparison of multi-parallel qPCR and double-slide Kato-Katz for detection of soil-transmitted helminth infection among children in rural Bangladesh**

**S1 Checklist: STARD Checklist**

| Section & Topic          | No         | Item                                                                                                                                                   | Reported on page #                         |
|--------------------------|------------|--------------------------------------------------------------------------------------------------------------------------------------------------------|--------------------------------------------|
| <b>TITLE OR ABSTRACT</b> |            |                                                                                                                                                        |                                            |
|                          | <b>1</b>   | Identification as a study of diagnostic accuracy using at least one measure of accuracy (such as sensitivity, specificity, predictive values, or AUC)  | Abstract                                   |
| <b>ABSTRACT</b>          |            |                                                                                                                                                        |                                            |
|                          | <b>2</b>   | Structured summary of study design, methods, results, and conclusions (for specific guidance, see STARD for Abstracts)                                 | Abstract                                   |
| <b>INTRODUCTION</b>      |            |                                                                                                                                                        |                                            |
|                          | <b>3</b>   | Scientific and clinical background, including the intended use and clinical role of the index test                                                     | Introduction, paragraph 2-4                |
|                          | <b>4</b>   | Study objectives and hypotheses                                                                                                                        | Introduction, paragraph 5                  |
| <b>METHODS</b>           |            |                                                                                                                                                        |                                            |
| <i>Study design</i>      | <b>5</b>   | Whether data collection was planned before the index test and reference standard were performed (prospective study) or after (retrospective study)     | Methods, paragraph 1-4                     |
| <i>Participants</i>      | <b>6</b>   | Eligibility criteria                                                                                                                                   | Methods, paragraph 1                       |
|                          | <b>7</b>   | On what basis potentially eligible participants were identified (such as symptoms, results from previous tests, inclusion in registry)                 | Methods, paragraph 1                       |
|                          | <b>8</b>   | Where and when potentially eligible participants were identified (setting, location and dates)                                                         | Methods, paragraph 1                       |
|                          | <b>9</b>   | Whether participants formed a consecutive, random or convenience series                                                                                | Methods, paragraph 1                       |
| <i>Test methods</i>      | <b>10a</b> | Index test, in sufficient detail to allow replication                                                                                                  | Methods, paragraph 3                       |
|                          | <b>10b</b> | Reference standard, in sufficient detail to allow replication                                                                                          | Methods, paragraph 4-7                     |
|                          | <b>11</b>  | Rationale for choosing the reference standard (if alternatives exist)                                                                                  | Introduction, paragraph 2-4                |
|                          | <b>12a</b> | Definition of and rationale for test positivity cut-offs or result categories of the index test, distinguishing pre-specified from exploratory         | Methods, paragraph 3                       |
|                          | <b>12b</b> | Definition of and rationale for test positivity cut-offs or result categories of the reference standard, distinguishing pre-specified from exploratory | Methods, paragraph 6                       |
|                          | <b>13a</b> | Whether clinical information and reference standard results were available to the performers/readers of the index test                                 | Methods, paragraph 3-4                     |
|                          | <b>13b</b> | Whether clinical information and index test results were available to the assessors of the reference standard                                          | Methods, paragraph 7                       |
| <i>Analysis</i>          | <b>14</b>  | Methods for estimating or comparing measures of diagnostic accuracy                                                                                    | Methods, paragraph 14-15                   |
|                          | <b>15</b>  | How indeterminate index test or reference standard results were handled                                                                                | Methods, paragraph 4, 6                    |
|                          | <b>16</b>  | How missing data on the index test and reference standard were handled                                                                                 | N/A                                        |
|                          | <b>17</b>  | Any analyses of variability in diagnostic accuracy, distinguishing pre-specified from exploratory                                                      | Methods, paragraph 14-15                   |
|                          | <b>18</b>  | Intended sample size and how it was determined                                                                                                         | Methods, paragraph 1                       |
| <b>RESULTS</b>           |            |                                                                                                                                                        |                                            |
| <i>Participants</i>      | <b>19</b>  | Flow of participants, using a diagram                                                                                                                  | S3 Appendix                                |
|                          | <b>20</b>  | Baseline demographic and clinical characteristics of participants                                                                                      | Methods, paragraph 1; Results, paragraph 1 |
|                          | <b>21a</b> | Distribution of severity of disease in those with the target condition                                                                                 | Results, paragraph 2                       |
|                          | <b>21b</b> | Distribution of alternative diagnoses in those without the target condition                                                                            | N/A                                        |

|                          |           |                                                                                                             |                                        |
|--------------------------|-----------|-------------------------------------------------------------------------------------------------------------|----------------------------------------|
|                          | <b>22</b> | Time interval and any clinical interventions between index test and reference standard                      | Methods, paragraph 2                   |
| <i>Test results</i>      | <b>23</b> | Cross tabulation of the index test results (or their distribution) by the results of the reference standard | Results, paragraph 3                   |
|                          | <b>24</b> | Estimates of diagnostic accuracy and their precision (such as 95% confidence intervals)                     | Results, paragraph 4                   |
|                          | <b>25</b> | Any adverse events from performing the index test or the reference standard                                 | N/A                                    |
| <b>DISCUSSION</b>        |           |                                                                                                             |                                        |
|                          | <b>26</b> | Study limitations, including sources of potential bias, statistical uncertainty, and generalisability       | Discussion, paragraph 2, 4, 7          |
|                          | <b>27</b> | Implications for practice, including the intended use and clinical role of the index test                   | Discussion, paragraph 1, 8; Conclusion |
| <b>OTHER INFORMATION</b> |           |                                                                                                             |                                        |
|                          | <b>28</b> | Registration number and name of registry                                                                    | Methods, paragraph 1                   |
|                          | <b>29</b> | Where the full study protocol can be accessed                                                               | Methods, paragraph 1                   |
|                          | <b>30</b> | Sources of funding and other support; role of funders                                                       | Acknowledgements                       |
