# Supplementary material for: Comparison of multi-parallel qPCR and double-slide Kato-Katz for detection of soil-transmitted helminth infection among children in rural Bangladesh
Source: PubMed Central journal article supplement (PMC7202662; doi:10.1371/journal.pntd.0008087), 2020-04-24
Supplement: pntd.0008087.s002.pdf [file pntd.0008087.s002.pdf]

**Comparison of multi-parallel qPCR and double-slide Kato-Katz for detection of soil-transmitted helminth infection among children in rural Bangladesh**

**S2 Checklist: STARD Bayes Latent Class Models Checklist**

| Section & Topic          | No  | Item                                                                                                                                                                                           | Reported on page #                         |
|--------------------------|-----|------------------------------------------------------------------------------------------------------------------------------------------------------------------------------------------------|--------------------------------------------|
| <b>TITLE OR ABSTRACT</b> |     |                                                                                                                                                                                                |                                            |
|                          | 1   | Identification as a study of diagnostic accuracy, using at least one measure of accuracy (such as sensitivity, specificity, predictive values, or AUC) <b>and Bayesian latent class models</b> | Abstract                                   |
| <b>ABSTRACT</b>          |     |                                                                                                                                                                                                |                                            |
|                          | 2   | Structured summary of study design, methods, results, and conclusions (for specific guidance, see STARD for Abstracts)                                                                         | Abstract                                   |
| <b>INTRODUCTION</b>      |     |                                                                                                                                                                                                |                                            |
|                          | 3   | Scientific and clinical background, including the intended use and clinical role of the <b>tests under evaluation</b>                                                                          | Introduction, paragraph 2-4                |
|                          | 4   | Study objectives and hypotheses, <b>such as estimation of diagnostic accuracy of the tests for a defined purpose through BLCM</b>                                                              | Introduction, paragraph 5                  |
| <b>METHODS</b>           |     |                                                                                                                                                                                                |                                            |
| <i>Study design</i>      | 5   | Whether data collection was planned before the <b>tests</b> were performed (prospective study) or after (retrospective study)                                                                  | Methods, paragraph 1-4                     |
| <i>Participants</i>      | 6   | Eligibility criteria <b>and description of the source population</b>                                                                                                                           | Methods, paragraph 1                       |
|                          | 7   | On what basis potentially eligible participants were identified (such as symptoms, results from previous tests, inclusion in registry)                                                         | Methods, paragraph 1                       |
|                          | 8   | Where and when potentially eligible participants were identified (setting, location and dates)                                                                                                 | Methods, paragraph 1                       |
|                          | 9   | Whether participants formed a consecutive, random or convenience series                                                                                                                        | Methods, paragraph 1                       |
| <i>Test methods</i>      | 10  | <b>Description of the tests under evaluation</b> , in sufficient detail to allow replication, <b>and/or cite references</b>                                                                    | Methods, paragraph 3-7                     |
|                          | 11  | Rationale for choosing the <b>tests under evaluation in relation to their purpose</b>                                                                                                          | Introduction, paragraph 2-4                |
|                          | 12  | Definition of and rationale for test positivity cut-offs or result categories of <b>the tests under evaluation</b> , distinguishing pre-specified from exploratory                             | Methods, paragraph 3                       |
|                          | 13  | Whether clinical information was available to the performers or readers of <b>the tests under evaluation</b>                                                                                   | Methods, paragraph 3-4                     |
| <i>Analysis</i>          | 14a | <b>BLCM model</b> for estimating measures of diagnostic accuracy                                                                                                                               | Methods, paragraph 14                      |
|                          | 14b | <b>Definition and rationale of prior information and sensitivity analysis</b>                                                                                                                  | Methods, paragraph 14                      |
|                          | 15  | How indeterminate results <b>of the tests under evaluation</b> were handled                                                                                                                    | Methods, paragraph 4, 6                    |
|                          | 16  | How missing data <b>of the tests under evaluation</b> were handled                                                                                                                             | N/A                                        |
|                          | 17  | Any analyses of variability in diagnostic accuracy, distinguishing pre-specified from exploratory                                                                                              | Methods, paragraph 12-14                   |
|                          | 18  | Intended sample size and how it was determined                                                                                                                                                 | Methods, paragraph 1                       |
| <b>RESULTS</b>           |     |                                                                                                                                                                                                |                                            |
| <i>Participants</i>      | 19  | Flow of participants, using a diagram                                                                                                                                                          | S3 Appendix                                |
|                          | 20  | Baseline demographic and clinical characteristics of participants                                                                                                                              | Methods, paragraph 7; Results, paragraph 1 |
|                          | 21  | <b>Not applicable: the distribution of the targeted conditions is unknown, hence the use of BLCM</b>                                                                                           |                                            |
|                          | 22  | Time interval and any clinical interventions between <b>the tests under evaluation</b>                                                                                                         | Methods, paragraph 2-3                     |
| <i>Test results</i>      | 23  | Cross tabulation of the <b>tests' results (or for continuous tests results their distribution by infection stage)</b>                                                                          | Results, paragraph 3; Table 3              |

|                          |           |                                                                                                                                                                           |                                        |
|--------------------------|-----------|---------------------------------------------------------------------------------------------------------------------------------------------------------------------------|----------------------------------------|
|                          | <b>24</b> | Estimates of diagnostic accuracy <b>under alternative prior specification</b> and their precision (such as 95% <b>credible/probability intervals</b> )                    | S3 Appendix                            |
|                          | <b>25</b> | Any adverse events from performing <b>the tests under evaluation</b>                                                                                                      | N/A                                    |
| <b>DISCUSSION</b>        |           |                                                                                                                                                                           |                                        |
|                          | <b>26</b> | Study limitations, including sources of potential bias, statistical uncertainty, and generalisability                                                                     | Discussion, paragraph 2, 4, 7          |
|                          | <b>27</b> | Implications for practice, including the intended use and clinical role of <b>the tests under evaluation in relevant settings (clinical, research, surveillance etc.)</b> | Discussion, paragraph 1, 8; Conclusion |
| <b>OTHER INFORMATION</b> |           |                                                                                                                                                                           |                                        |
|                          | <b>28</b> | Registration number and name of registry                                                                                                                                  | Methods, paragraph 1                   |
|                          | <b>29</b> | Where the full study protocol can be accessed                                                                                                                             | Methods, paragraph 1                   |
|                          | <b>30</b> | Sources of funding and other support; role of funders                                                                                                                     | Acknowledgements                       |

## STARD - BLCM

STARD-BLCM stands for “Standards for the Reporting of Diagnostic accuracy studies that use Bayesian Latent Class Models” and is a modification of the STARD statement (which was recently updated to STARD2015). STARD-BLCM aims to facilitate improved quality of reporting for diagnostic accuracy studies that use Bayesian latent class models in the absence of a reference standard. The proposed modifications are relevant to both Bayesian and frequentist estimation methods but the focus is on the former.

More information for STARD (STARD2015) can be found at: <http://www.equator-network.org/reporting-guidelines/stard>

More information for STARD-BLCM can be found at: <http://www.equator-network.org/reporting-guidelines/stard-bcm>
