# Supplementary material for: Comparison of multi-parallel qPCR and double-slide Kato-Katz for detection of soil-transmitted helminth infection among children in rural Bangladesh
Source: PubMed Central journal article supplement (PMC7202662; doi:10.1371/journal.pntd.0008087), 2020-04-24
Supplement: pntd.0008087.s003.pdf [file pntd.0008087.s003.pdf]

***Comparison of multi-parallel qPCR and double-slide Kato-Katz for detection of soil-transmitted helminth infection among children in rural Bangladesh***

**S1 Table. Percent agreement between the original Kato-Katz technician and the senior parasitologist by days elapsed between each assessment**

| <b>Days</b> | <b>Ascaris</b> | <b>Hookworm</b> | <b>Trichuris</b> |
|-------------|----------------|-----------------|------------------|
| 0           | 1.00           | 1.00            | 1.00             |
| 1           | 0.91           | 0.33            | 0.81             |
| 2-4         | 0.94           | 0.11            | 0.91             |
| >4          | 0.88           | 0.00            | 0.83             |
| Overall     | 0.92           | 0.20            | 0.86             |
