# Supplementary material for: Comparison of multi-parallel qPCR and double-slide Kato-Katz for detection of soil-transmitted helminth infection among children in rural Bangladesh
Source: PubMed Central journal article supplement (PMC7202662; doi:10.1371/journal.pntd.0008087), 2020-04-24
Supplement: pntd.0008087.s006.pdf [file pntd.0008087.s006.pdf]

**Comparison of multi-parallel qPCR and double-slide Kato-Katz for detection of soil-transmitted helminth infection among children in rural Bangladesh**

**S4 Table. Primer sequences used for 18S SSU sequencing**

| Primer Name                | Primer Sequence (5' → 3') <sup>a</sup>                                                   |
|----------------------------|------------------------------------------------------------------------------------------|
| Read 1 Sequencing Primer   | TATCGCCGTTCCGGTACACACCGCCCGTC                                                            |
| Read 2 Sequencing Primer   | AGTCAGCCAGCATGATCCTTCTGCAGGTTACCTAC                                                      |
| Index Sequence Primer      | GTAGGTGAACCTGCAGAAGGATCATGCTGACTGACT                                                     |
|                            |                                                                                          |
| Forward Primer for PCR     | AATGATACGGCGACCACCGAGATCTACACTATCGCCGTTCCGGTACACACCGCCGTC                                |
|                            |                                                                                          |
| Reverse Primer for PCR #1  | CAAGCAGAAGACGGCATAACGAGAT <u>ACGAGACTGATT</u> AGTCAGTCAGCATGATCCTTCTGCAGGTTACCTAC        |
| Reverse Primer for PCR #2  | CAAGCAGAAGACGGCATAACGAGAT <u>GCTGTACGGATT</u> AGTCAGTCAGCATGATCCTTCTGCAGGTTACCTAC        |
| Reverse Primer for PCR #3  | CAAGCAGAAGACGGCATAACGAGAT <u>ATCACCAGGTGT</u> AGTCAGTCAGCATGATCCTTCTGCAGGTTACCTAC        |
| Reverse Primer for PCR #4  | CAAGCAGAAGACGGCATAACGAGAT <u>TGGTCAACGATA</u> AGTCAGTCAGCATGATCCTTCTGCAGGTTACCTAC        |
| Reverse Primer for PCR #5  | CAAGCAGAAGACGGCATAACGAGAT <u>ATCGCACAGTAA</u> AGTCAGTCAGCATGATCCTTCTGCAGGTTACCTAC        |
| Reverse Primer for PCR #6  | CAAGCAGAAGACGGCATAACGAGAT <u>GTCGTGTAGCCT</u> AGTCAGTCAGCATGATCCTTCTGCAGGTTACCTAC        |
| Reverse Primer for PCR #7  | CAAGCAGAAGACGGCATAACGAGAT <u>AGCGGAGGTTA</u> AGTCAGTCAGCATGATCCTTCTGCAGGTTACCTAC         |
| Reverse Primer for PCR #8  | CAAGCAGAAGACGGCATAACGAGAT <u>TACAGCGCATA</u> AGTCAGTCAGCATGATCCTTCTGCAGGTTACCTAC         |
| Reverse Primer for PCR #9  | CAAGCAGAAGACGGCATAACGAGAT <u>AATTGTGTCGGA</u> AGTCAGTCAGCATGATCCTTCTGCAGGTTACCTAC        |
| Reverse Primer for PCR #10 | CAAGCAGAAGACGGCATAACGAGAT <u>TGCATACACTGG</u> AGTCAGTCAGCATGATCCTTCTGCAGGTTACCTAC        |
|                            |                                                                                          |
| Mammal Blocking Primer     | GCCCGTCGCTACTACCGATTGG/ideoxyl//ideoxyl//ideoxyl//ideoxyl//ideoxyl//TTAGTGAGGCCCT/3SpC3/ |

<sup>a</sup> The barcode sequence in each reverse primer is underlined.
