# Supplementary material for: Comparison of multi-parallel qPCR and double-slide Kato-Katz for detection of soil-transmitted helminth infection among children in rural Bangladesh
Source: PubMed Central journal article supplement (PMC7202662; doi:10.1371/journal.pntd.0008087), 2020-04-24
Supplement: pntd.0008087.s007.pdf [file pntd.0008087.s007.pdf]

**Comparison of multi-parallel qPCR and double-slide Kato-Katz for detection of soil-transmitted helminth infection among children in rural Bangladesh**

**S5 Table. Prior distributions used in Bayesian latent class analysis models**

|                       | <i>A. lumbricoides</i>                                         | Hookworm                                                       | <i>T. trichiura</i>                                            |
|-----------------------|----------------------------------------------------------------|----------------------------------------------------------------|----------------------------------------------------------------|
| Prevalence            | Beta distribution with shape parameters $\alpha=1$ , $\beta=1$ | Beta distribution with shape parameters $\alpha=1$ , $\beta=1$ | Beta distribution with shape parameters $\alpha=1$ , $\beta=1$ |
| Kato-Katz sensitivity | Beta distribution with shape parameters $\alpha=1$ , $\beta=1$ | Beta distribution with shape parameters $\alpha=3$ , $\beta=3$ | Beta distribution with shape parameters $\alpha=3$ , $\beta=3$ |
| Kato-Katz specificity | Beta distribution with shape parameters $\alpha=1$ , $\beta=1$ | Uniform distribution with minimum=0.95, maximum=1              | Uniform distribution with minimum=0.95, maximum=1              |
| qPCR sensitivity      | Uniform distribution with minimum=0.60, maximum=1              | Uniform distribution with minimum=0.80, maximum=1              | Uniform distribution with minimum=0.80, maximum=1              |
| qPCR specificity      | Uniform distribution with minimum=0.95, maximum=1              | Uniform distribution with minimum=0.95, maximum=1              | Uniform distribution with minimum=0.95, maximum=1              |

Due to the discrepancy between Kato-Katz and qPCR results for *A. lumbricoides*, we chose non-informative prior distributions for Kato-Katz sensitivity and specificity and a less informative prior distribution for qPCR sensitivity.
