# Supplementary material for: Comparison of multi-parallel qPCR and double-slide Kato-Katz for detection of soil-transmitted helminth infection among children in rural Bangladesh
Source: PubMed Central journal article supplement (PMC7202662; doi:10.1371/journal.pntd.0008087), 2020-04-24
Supplement: pntd.0008087.s010.pdf [file pntd.0008087.s010.pdf]

**Comparison of multi-parallel qPCR and double-slide Kato-Katz for detection of soil-transmitted helminth infection among children in rural Bangladesh**

**S8 Table. Sensitivity analysis using alternative prior distributions in Bayesian latent class analysis models for *A. lumbricoides***

| Analysis                | Description of priors                                                             | Kato-Katz             |                       | qPCR                  |                       |
|-------------------------|-----------------------------------------------------------------------------------|-----------------------|-----------------------|-----------------------|-----------------------|
|                         |                                                                                   | Sensitivity (95% BCI) | Specificity (95% BCI) | Sensitivity (95% BCI) | Specificity (95% BCI) |
| Primary analysis result | Noninformative priors                                                             | 49 (34, 64)           | 68 (61, 77)           | 79 (61, 99)           | 97 (95, 100)          |
| Sensitivity analysis 1  | More informative prior for Kato-Katz sensitivity and specificity                  | 49 (34, 64)           | 68 (62, 76)           | 80 (61, 99)           | 97 (95, 100)          |
| Sensitivity analysis 2  | More informative prior for qPCR sensitivity                                       | 49 (38, 59)           | 67 (63, 71)           | 90 (80, 99)           | 97 (95, 100)          |
| Sensitivity analysis 3  | More informative prior for sensitivity and specificity of both Kato-Katz and qPCR | 49 (39, 59)           | 67 (63, 71)           | 90 (80, 99)           | 97 (95, 100)          |
