# Supplementary material for: Comparison of multi-parallel qPCR and double-slide Kato-Katz for detection of soil-transmitted helminth infection among children in rural Bangladesh
Source: PubMed Central journal article supplement (PMC7202662; doi:10.1371/journal.pntd.0008087), 2020-04-24
Supplement: pntd.0008087.s014.pdf [file pntd.0008087.s014.pdf]

**Comparison of multi-parallel qPCR and double-slide Kato-Katz for detection of soil-transmitted helminth infection among children in rural Bangladesh**

**S2 Figure. Percent agreement between laboratory technicians and expert technicians in STH positive/negative status in individual slides**

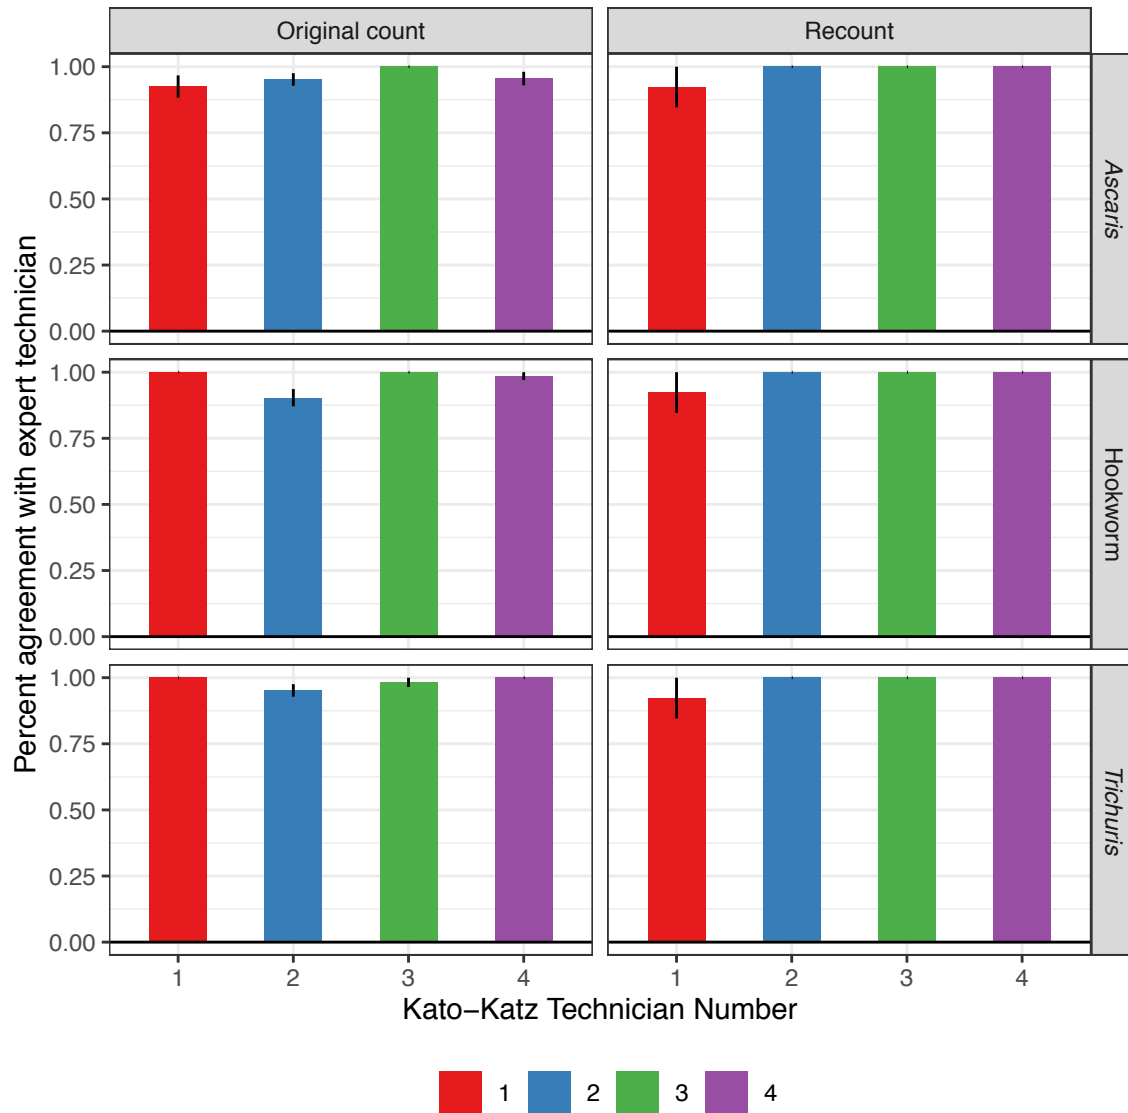

Each bar indicates the percent agreement in STH positive/negative status between an individual technician and an expert technician on a single slide reading. The black vertical line indicates the 95% confidence interval.
