# Supplementary material for: Comparison of multi-parallel qPCR and double-slide Kato-Katz for detection of soil-transmitted helminth infection among children in rural Bangladesh
Source: PubMed Central journal article supplement (PMC7202662; doi:10.1371/journal.pntd.0008087), 2020-04-24
Supplement: pntd.0008087.s017.pdf [file pntd.0008087.s017.pdf]

**Comparison of multi-parallel qPCR and double-slide Kato-Katz for detection of soil-transmitted helminth infection among children in rural Bangladesh**

**S5 Figure. Probability that a stool sample was classified as positive for *A. lumbricoides* using Kato-Katz among those classified as negative by qPCR by individual Kato-Katz technician**

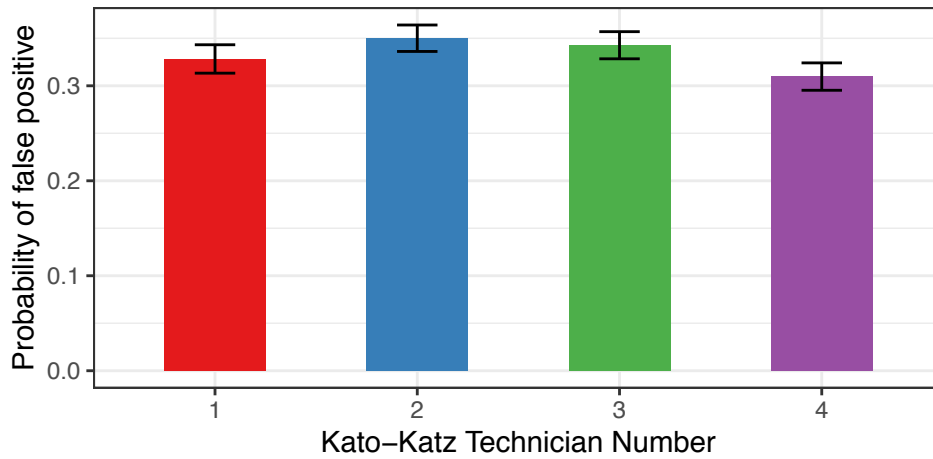

Each bar indicates the probability that a sample was classified as positive by Kato-Katz among those classified as negative by qPCR for an individual technician. The black vertical line indicates the 95% confidence interval.
