# Supplementary material for: Comparison of multi-parallel qPCR and double-slide Kato-Katz for detection of soil-transmitted helminth infection among children in rural Bangladesh
Source: PubMed Central journal article supplement (PMC7202662; doi:10.1371/journal.pntd.0008087), 2020-04-24
Supplement: pntd.0008087.s019.pdf [file pntd.0008087.s019.pdf]

**Comparison of multi-parallel qPCR and double-slide Kato-Katz for detection of soil-transmitted helminth infection among children in rural Bangladesh**

**S7 Figure. Cumulative probability that a stool sample was classified as positive for *A. lumbricoides* using Kato-Katz among those classified as negative by qPCR by date of DNA extraction**

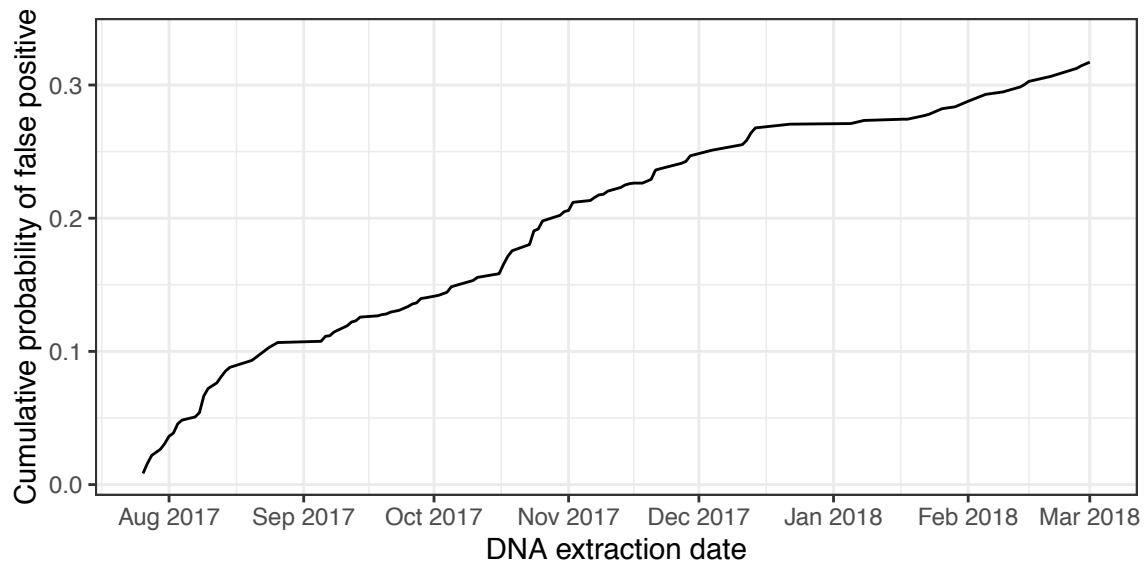

The date of DNA extraction was not recorded for the last 242 samples; we imputed the date for those samples as 1 day later than the last recorded date. Data were not included for hookworm and *Trichuris* since only 1% of samples were classified as positive by Kato-Katz among those classified as negative by qPCR for those STH.
