# Supplementary material for: Comparison of multi-parallel qPCR and double-slide Kato-Katz for detection of soil-transmitted helminth infection among children in rural Bangladesh
Source: PLoS Negl Trop Dis. 2020 Apr 24;14(4):e0008087. doi: 10.1371/journal.pntd.0008087 (PMC7202662; doi:10.1371/journal.pntd.0008087)
Supplement: S9 Table — Following de-multiplexing by barcode, OTUs underwent taxonomic assignment. For each sample, the number of interlaced read pairs mapping to each taxonomic assignment is provided. (XLSX) [file pntd.0008087.s011.xlsx]

## Sheet: Readme
Comparison of multi-parallel qPCR and double-slide Kato-Katz for detection of soil-transmitted helminth infection among children in rural Bangladesh
S9 Appendix
Taxonomic assignments for OTUs resulting from sequencing analysis with the Qiime2 pipeline. Following de-multiplexing by barcode, OTUs underwent taxonomic assignment. For each sample, the number of interlaced read pairs mapping to each taxonomic assignment is provided.

## Sheet: S9 Appendix.csv
Sample ID	Eukaryota;Amoebozoa;Discosea;Longamoebia;Centramoebida;Acanthamoeba;Acanthamoeba stevensoni;__;__;__;__;__;__;__	Eukaryota;Archaeplastida;Chloroplastida;Charophyta;Phragmoplastophyta;Streptophyta;Embryophyta;Tracheophyta;Spermatophyta;Magnoliophyta;Apiales;Cnidium;Cnidium monnieri;__	Eukaryota;Archaeplastida;Chloroplastida;Charophyta;Phragmoplastophyta;Streptophyta;Embryophyta;Tracheophyta;Spermatophyta;Magnoliophyta;Brassicales;Brassica;Brassica napus (rape);__	Eukaryota;Archaeplastida;Chloroplastida;Charophyta;Phragmoplastophyta;Streptophyta;Embryophyta;Tracheophyta;Spermatophyta;Magnoliophyta;Caryophyllales;Amaranthus;Amaranthus tuberculatus;__	Eukaryota;Archaeplastida;Chloroplastida;Charophyta;Phragmoplastophyta;Streptophyta;Embryophyta;Tracheophyta;Spermatophyta;Magnoliophyta;Caryophyllales;Rheum;Rheum palmatum;__	Eukaryota;Archaeplastida;Chloroplastida;Charophyta;Phragmoplastophyta;Streptophyta;Embryophyta;Tracheophyta;Spermatophyta;Magnoliophyta;Cucurbitales;Cucumis;Cucumis sativus (cucumber);__	Eukaryota;Archaeplastida;Chloroplastida;Charophyta;Phragmoplastophyta;Streptophyta;Embryophyta;Tracheophyta;Spermatophyta;Magnoliophyta;Fabales;Glycine;Glycine max (soybean);__	Eukaryota;Archaeplastida;Chloroplastida;Charophyta;Phragmoplastophyta;Streptophyta;Embryophyta;Tracheophyta;Spermatophyta;Magnoliophyta;Fabales;Vigna;Vigna unguiculata subsp. unguiculata (cowpea);__	Eukaryota;Archaeplastida;Chloroplastida;Charophyta;Phragmoplastophyta;Streptophyta;Embryophyta;Tracheophyta;Spermatophyta;Magnoliophyta;Liliopsida;Alismatales;Zantedeschia;Zantedeschia aethiopica	Eukaryota;Archaeplastida;Chloroplastida;Charophyta;Phragmoplastophyta;Streptophyta;Embryophyta;Tracheophyta;Spermatophyta;Magnoliophyta;Liliopsida;Incertae Sedis;Elaeis;Elaeis guineensis (African oil palm)	Eukaryota;Archaeplastida;Chloroplastida;Charophyta;Phragmoplastophyta;Streptophyta;Embryophyta;Tracheophyta;Spermatophyta;Magnoliophyta;Liliopsida;Poales;Oryza;Zea mays subsp. mays (maize)	Eukaryota;Archaeplastida;Chloroplastida;Charophyta;Phragmoplastophyta;Streptophyta;Embryophyta;Tracheophyta;Spermatophyta;Magnoliophyta;Liliopsida;Zingiberales;Curcuma;Curcuma elata	Eukaryota;Archaeplastida;Chloroplastida;Charophyta;Phragmoplastophyta;Streptophyta;Embryophyta;Tracheophyta;Spermatophyta;Magnoliophyta;Liliopsida;Zingiberales;Curcuma;Zingiber mioga	Eukaryota;Archaeplastida;Chloroplastida;Charophyta;Phragmoplastophyta;Streptophyta;Embryophyta;Tracheophyta;Spermatophyta;Magnoliophyta;Liliopsida;Zingiberales;Musa;Musa itinerans	Eukaryota;Archaeplastida;Chloroplastida;Charophyta;Phragmoplastophyta;Streptophyta;Embryophyta;Tracheophyta;Spermatophyta;Magnoliophyta;Malvales;Gossypium;Gossypium barbadense (sea-island cotton);__	Eukaryota;Archaeplastida;Chloroplastida;Charophyta;Phragmoplastophyta;Streptophyta;Embryophyta;Tracheophyta;Spermatophyta;Magnoliophyta;Medicago truncatula (barrel medic);__;__;__	Eukaryota;Archaeplastida;Chloroplastida;Charophyta;Phragmoplastophyta;Streptophyta;Embryophyta;Tracheophyta;Spermatophyta;Magnoliophyta;Myrtales;Eucalyptus;Eucalyptus grandis;__	Eukaryota;Archaeplastida;Chloroplastida;Charophyta;Phragmoplastophyta;Streptophyta;Embryophyta;Tracheophyta;Spermatophyta;Magnoliophyta;Rosales;Broussonetia;Broussonetia papyrifera;__	Eukaryota;Archaeplastida;Chloroplastida;Charophyta;Phragmoplastophyta;Streptophyta;Embryophyta;Tracheophyta;Spermatophyta;Magnoliophyta;Rosales;Ziziphus;Ziziphus jujuba;__	Eukaryota;Archaeplastida;Chloroplastida;Charophyta;Phragmoplastophyta;Streptophyta;Embryophyta;Tracheophyta;Spermatophyta;Magnoliophyta;Solanales;Nicotiana;Nicotiana attenuata;__	Eukaryota;Archaeplastida;Chloroplastida;Charophyta;Phragmoplastophyta;Streptophyta;Embryophyta;Tracheophyta;Spermatophyta;Magnoliophyta;Solanales;Solanum;Solanum tuberosum (potato);__	Eukaryota;Archaeplastida;Chloroplastida;Chlorophyta;Chlorophyceae;Pectinodesmus pectinatus;__;__;__;__;__;__;__;__	Eukaryota;Archaeplastida;Chloroplastida;Chlorophyta;Chlorophyceae;Sphaeropleales;Scenedesmus;Desmodesmus communis;__;__;__;__;__;__	Eukaryota;Archaeplastida;Chloroplastida;Chlorophyta;Trebouxiophyceae;Apatococcus lobatus;__;__;__;__;__;__;__;__	Eukaryota;Archaeplastida;Chloroplastida;Chlorophyta;Trebouxiophyceae;Prototheca zopfii var. hydrocarbonea;__;__;__;__;__;__;__;__	Eukaryota;Archaeplastida;Rhodophyceae;Florideophycidae;Nemaliophycidae;Petrohua;Petrohua bernabei;__;__;__;__;__;__;__	Eukaryota;Excavata;Discoba;Discicristata;Euglenozoa;Kinetoplastea;Metakinetoplastina;Trypanosomatida;Zelonia;Zelonia cf. costaricensis;__;__;__;__	Eukaryota;Excavata;Metamonada;Fornicata;Diplomonadida;Giardiinae;Giardia;Giardia intestinalis;__;__;__;__;__;__	Eukaryota;Excavata;Metamonada;Parabasalia;Tritrichomonadea;Dientamoeba;Dientamoeba fragilis;__;__;__;__;__;__;__	Eukaryota;Opisthokonta;Holozoa;Metazoa (Animalia);Eumetazoa;Bilateria;Arthropoda;Chelicerata;Arachnida;Acari;Puccinia striiformis f. sp. tritici 87/7;__;__;__	Eukaryota;Opisthokonta;Holozoa;Metazoa (Animalia);Eumetazoa;Bilateria;Arthropoda;Crustacea;Maxillopoda;Copepoda;Calanoida;uncultured eukaryote;__;__	Eukaryota;Opisthokonta;Holozoa;Metazoa (Animalia);Eumetazoa;Bilateria;Chordata;Vertebrata;Gnathostomata;Euteleostomi;Tetrapoda;Mammalia;Homo sapiens (human);__	Eukaryota;Opisthokonta;Holozoa;Metazoa (Animalia);Eumetazoa;Bilateria;Chordata;Vertebrata;Gnathostomata;Euteleostomi;Tetrapoda;Mammalia;Tursiops truncatus (bottlenose dolphin);__	Eukaryota;Opisthokonta;Holozoa;Metazoa (Animalia);Eumetazoa;Bilateria;Mollusca;Bivalvia;Palaeoheterodonta;Unionoida;Elliptio complanata (eastern elliptio);__;__;__	Eukaryota;Opisthokonta;Holozoa;Metazoa (Animalia);Eumetazoa;Bilateria;Nematoda;Chromadorea;Oxyurida;Enterobius vermicularis (human pinworm);__;__;__;__	Eukaryota;Opisthokonta;Holozoa;Metazoa (Animalia);Eumetazoa;Bilateria;Nematoda;Chromadorea;Spirurida;Ascaris lumbricoides (common roundworm);__;__;__;__	Eukaryota;Opisthokonta;Holozoa;Metazoa (Animalia);Eumetazoa;Bilateria;Platyhelminthes;Rhabditophora;Seriata;Tricladida;Continenticola;Schmidtea mediterranea;__;__	Eukaryota;Opisthokonta;Holozoa;Metazoa (Animalia);Eumetazoa;Cnidaria;Hydrozoa;Hydroidolina;Siphonophorae;uncultured eukaryote;__;__;__;__	Eukaryota;Opisthokonta;Holozoa;Metazoa (Animalia);Eumetazoa;Cnidaria;Myxozoa;Myxosporea;Bivalvulida;Thelohanellus kitauei;__;__;__;__	Eukaryota;Opisthokonta;Nucletmycea;Fungi;Dikarya;Ascomycota;Pezizomycotina;Eurotiomycetes;Eurotiales;Aspergillaceae;Aspergillus;Aspergillus candidus;__;__	Eukaryota;Opisthokonta;Nucletmycea;Fungi;Dikarya;Ascomycota;Pezizomycotina;Eurotiomycetes;Eurotiales;Aspergillaceae;Aspergillus;Aspergillus cristatus;__;__	Eukaryota;Opisthokonta;Nucletmycea;Fungi;Dikarya;Ascomycota;Pezizomycotina;Eurotiomycetes;Eurotiales;Aspergillaceae;Aspergillus;Aspergillus lentulus;__;__	Eukaryota;Opisthokonta;Nucletmycea;Fungi;Dikarya;Ascomycota;Pezizomycotina;Eurotiomycetes;Eurotiales;Aspergillaceae;Aspergillus;Aspergillus niger ATCC 1015;__;__	Eukaryota;Opisthokonta;Nucletmycea;Fungi;Dikarya;Ascomycota;Pezizomycotina;Eurotiomycetes;Eurotiales;Aspergillaceae;Aspergillus;Aspergillus penicillioides;__;__	Eukaryota;Opisthokonta;Nucletmycea;Fungi;Dikarya;Ascomycota;Pezizomycotina;Eurotiomycetes;Eurotiales;Aspergillaceae;Aspergillus;Aspergillus ustus;__;__	Eukaryota;Opisthokonta;Nucletmycea;Fungi;Dikarya;Ascomycota;Pezizomycotina;Eurotiomycetes;Eurotiales;Aspergillaceae;Penicilliopsis;Penicilliopsis clavariiformis;__;__	Eukaryota;Opisthokonta;Nucletmycea;Fungi;Dikarya;Ascomycota;Pezizomycotina;Eurotiomycetes;Eurotiales;Trichocomaceae;Talaromyces;Talaromyces purpureogenus;__;__	Eukaryota;Opisthokonta;Nucletmycea;Fungi;Dikarya;Ascomycota;Pezizomycotina;Pezizomycetes;Pezizales;Rhizinaceae;Phymatotrichopsis;uncultured eukaryote;__;__	Eukaryota;Opisthokonta;Nucletmycea;Fungi;Dikarya;Ascomycota;Saccharomycotina;Saccharomycetes;Saccharomycetales;Debaryomycetaceae;Candida-Lodderomyces clade;Candida dubliniensis;__;__
Kato-Katz Positive / PCR Negative #1	0	0	0	0	0	0	0	0	0	144	0	0	0	0	0	0	0	0	0	0	0	0	0	0	0	0	0	3421	127305	81	0	0	0	8	252725	0	0	0	0	0	0	0	437	0	0	0	36	0	0
Kato-Katz Positive / PCR Negative #2	0	233	0	0	0	195	0	93	0	0	277	0	0	190	0	173	0	0	0	127	0	0	0	0	0	0	35	0	0	0	5	125	0	0	0	0	0	0	129	0	0	0	0	0	0	53	0	0	0
Kato-Katz Positive / PCR Negative #3	0	2824	0	0	958	0	0	0	0	0	0	88	108	8308	0	27	0	0	0	14274	87	43	0	0	0	0	0	0	0	0	0	179	63	0	0	0	0	7	0	0	0	0	0	274	68	0	0	0	0
Kato-Katz Positive / PCR Negative #4	0	33	0	0	0	0	0	0	0	0	0	0	0	0	0	110	0	0	140	0	0	0	0	0	0	0	0	0	0	0	0	311	0	0	0	0	0	0	0	0	0	0	0	0	0	0	0	0	0
Kato-Katz Positive / PCR Negative #5	0	538	13	0	0	0	0	0	0	0	556	0	0	0	0	640	2200	0	16211	0	0	35	0	11	0	0	0	103	0	0	0	13658	655	0	0	0	0	0	0	0	0	0	0	309	0	0	140	0	0
Kato-Katz Positive / PCR Negative #6	0	45	0	0	0	0	0	0	0	0	0	0	0	0	0	259	0	0	0	132	0	0	39	0	0	0	0	0	94	0	0	96	0	0	0	0	0	0	0	0	211	0	0	0	0	0	0	37	0
Kato-Katz Positive / PCR Negative #7	0	0	13	1067	0	0	207	0	120	0	62	0	0	0	0	0	0	24	0	0	0	0	0	0	0	0	0	117	60	0	0	5513	191	0	4	0	0	0	0	0	0	0	0	252	0	0	0	0	0
Kato-Katz Negative / PCR Positive #1	0	0	0	0	0	0	0	0	0	0	0	0	0	0	0	0	0	0	0	0	0	0	0	0	0	0	14	0	0	0	0	1043	115	0	0	0	0	0	0	161	0	0	0	1184	0	0	0	0	109
Kato-Katz Negative / PCR Positive #2	16	0	79	0	0	0	0	0	0	373	0	0	0	0	230	0	0	0	0	0	0	0	0	0	58	12	0	0	333	0	356	1014	74	0	110829	383	0	0	0	0	0	120	0	0	0	0	0	0	0
Kato-Katz Negative / PCR Negative	0	0	0	0	0	0	0	0	0	0	0	0	0	0	0	0	0	0	0	142	0	0	0	0	0	0	0	7910	10752	0	0	79	0	0	85879	0	21	0	0	189	0	0	0	40	0	0	0	0	0
[truncated: 51 more columns]
