# Supplementary material for: Comparison of multi-parallel qPCR and double-slide Kato-Katz for detection of soil-transmitted helminth infection among children in rural Bangladesh
Source: PLOS journal article supplement (doi:10.1371/journal.pntd.0008087), 2020-04-24

**Comparison of multi-parallel qPCR and double-slide Kato-Katz for detection of soil-transmitted helminth infection among children in rural Bangladesh**

**S4 Figure. Distribution of *A. lumbricoides* eggs per gram classified by concordance status between Kato-Katz and qPCR**

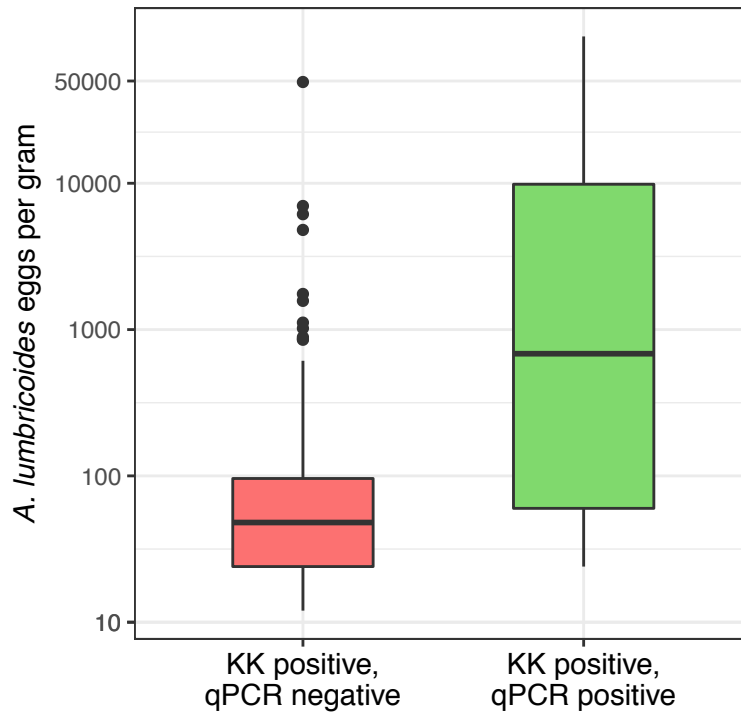

Supplement: S16 (10.1371/journal.pntd.0008087.s016) [file journal.pntd.0008087.s016]
