# Supplementary material for: Comparison of multi-parallel qPCR and double-slide Kato-Katz for detection of soil-transmitted helminth infection among children in rural Bangladesh
Source: PLOS journal article supplement (doi:10.1371/journal.pntd.0008087), 2020-04-24
Supplement: S22 (10.1371/journal.pntd.0008087.s022) [file journal.pntd.0008087.s022]

**Comparison of multi-parallel qPCR and double-slide Kato-Katz for detection of soil-transmitted helminth infection among children in rural Bangladesh**

**S10 Figure. Distribution of Cq values for each soil-transmitted helminth**

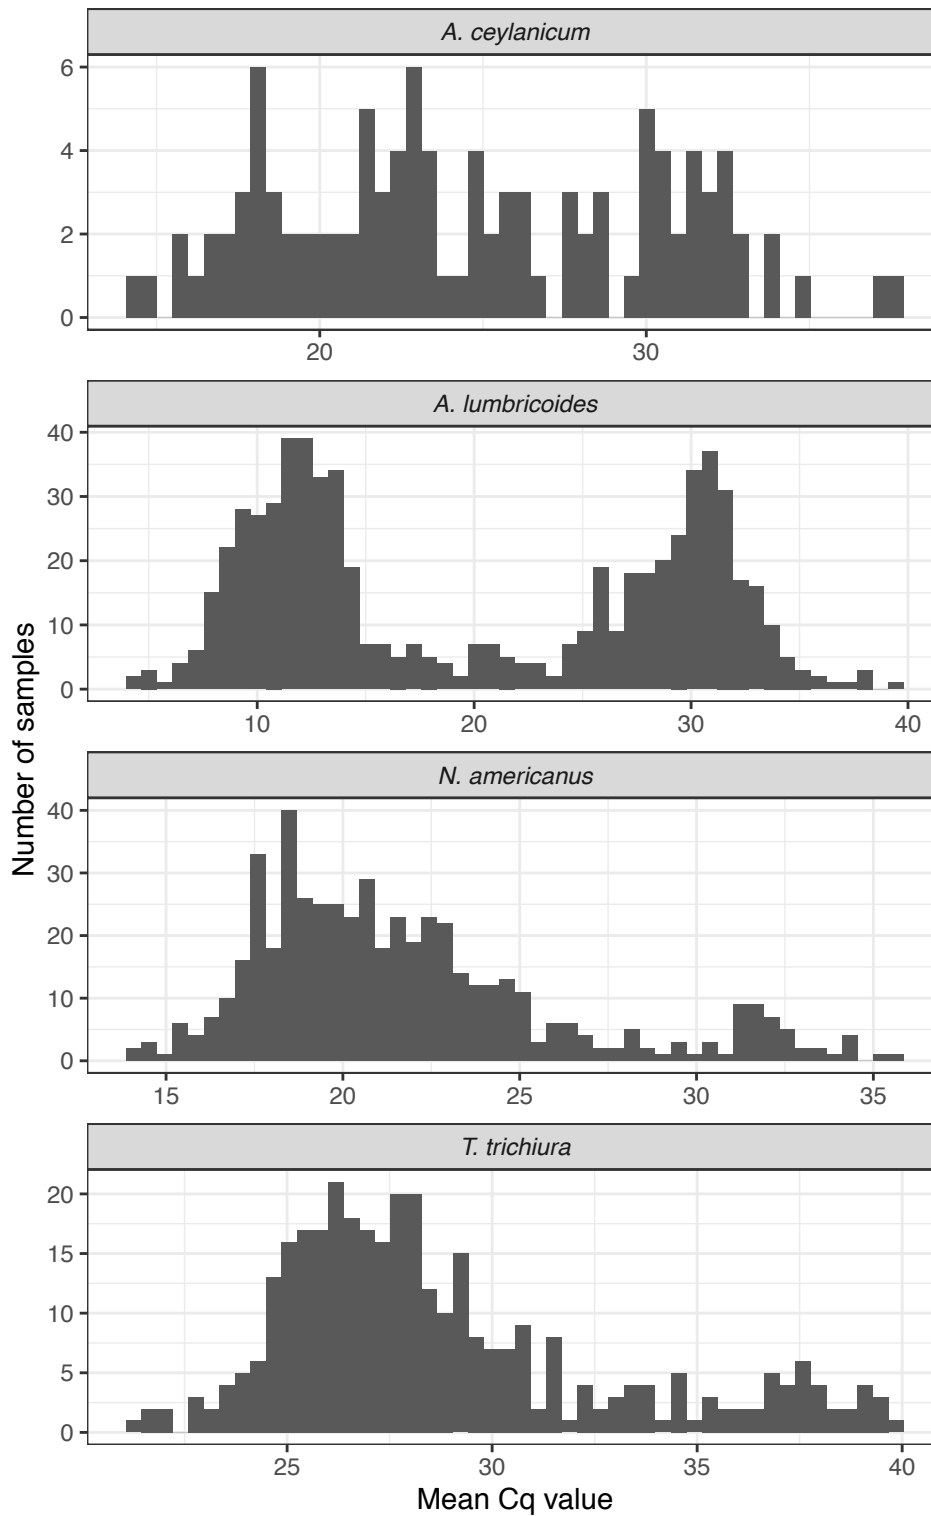

A panel was not included for *A. duodenale* due to the small number of samples in which any DNA was detected for that species.
